# Supplementary material
Source: PubMed Central journal article supplement (PMC4416875)
Supplement: supp_M114.619833_jbc.M114.619833-1.pdf [file supp_M114.619833_jbc.M114.619833-1.pdf]

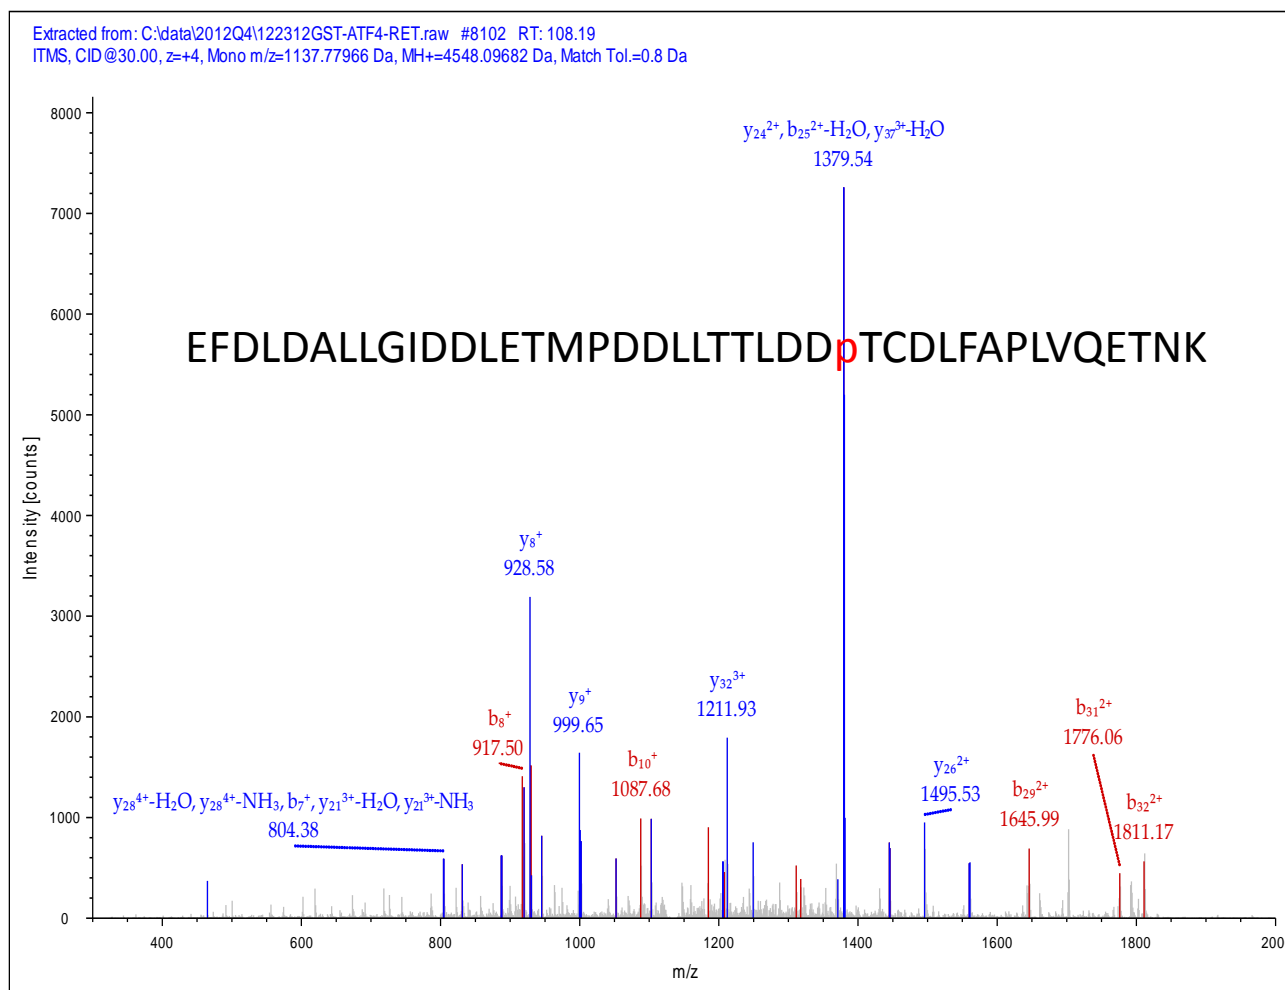

**Supplementary Figure 1.** Sequence: EFDLDALLGIDDLETMPDDLTTLLDDTCDLFAPLVQETNK, T27-Phospho (79.96633 Da)  
 Charge: +4, Monoisotopic m/z: 1137.77966 Da (+2.63 mmu/+2.31 ppm), MH+: 4548.09682 Da, RT: 108.19 min,  
 Identified with: Mascot (v1.27); IonScore:65, Exp Value:2.0E-005, Ions matched by search engine: 35/394  
 Fragment match tolerance used for search: 0.8 Da

Extracted from: C:\data\2012Q4\122312GST-ATF4-RET.raw #8101 RT: 108.17  
ITMS, CID@30.00, z=+4, Mono m/z=1141.77173 Da, MH+=4564.06508 Da, Match Tol.=0.8 Da

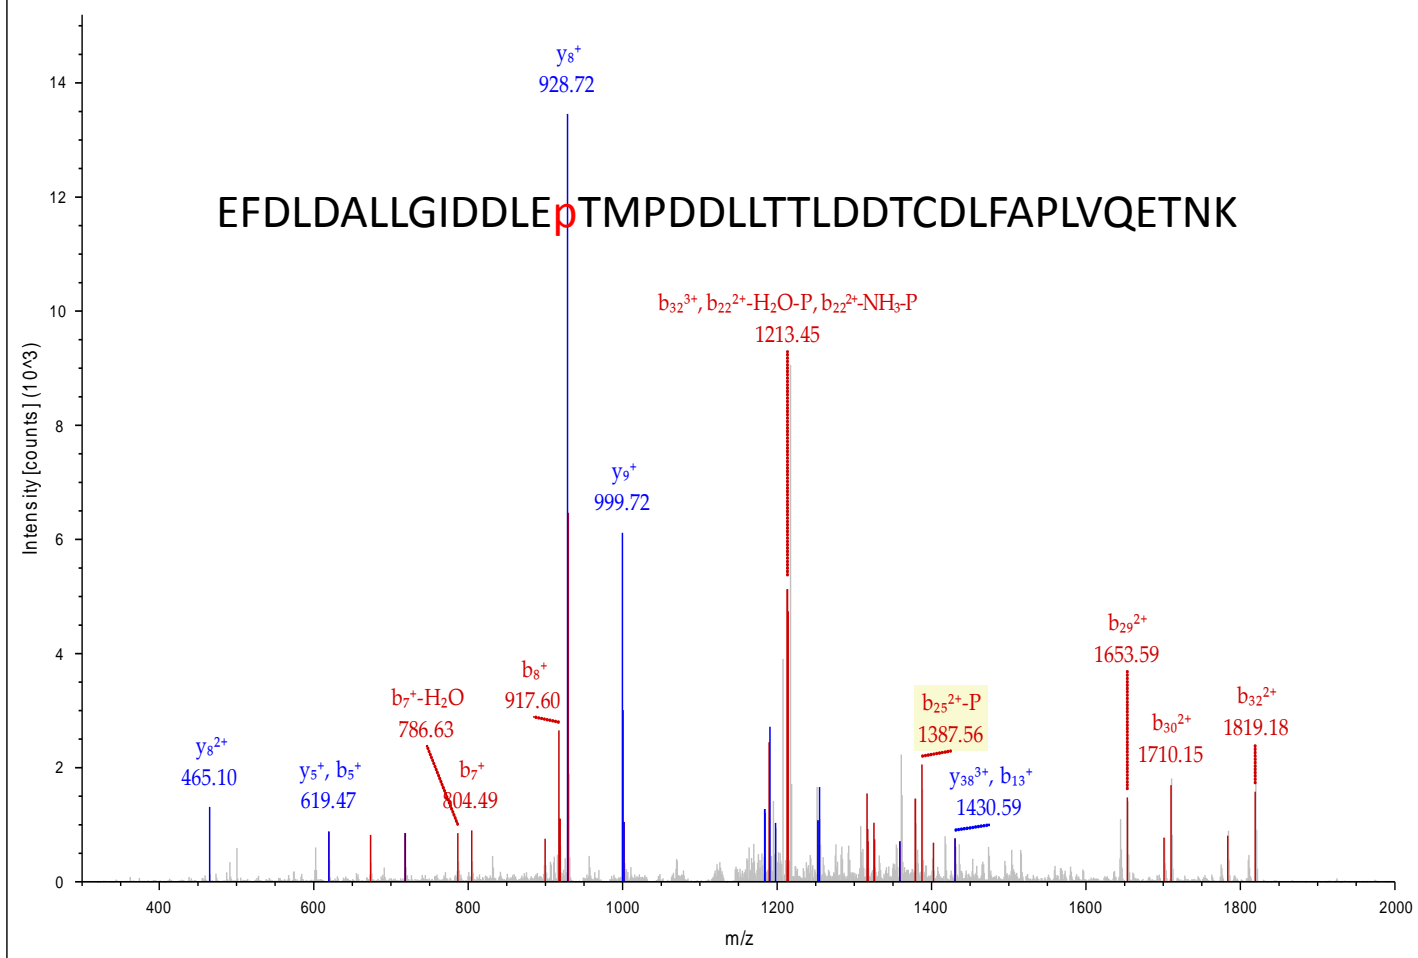

**Supplementary Figure 2.** Sequence: EFDLDALLGIDDLTPMPDDLTTLLDDTCDLFAPLVQETNK, T15-Phospho (79.96633 Da), M16-Oxidation (15.99492 Da), Charge: +4, Monoisotopic m/z: 1141.77173 Da (-4.04 mmu/-3.53 ppm), MH+: 4564.06508 Da, RT: 108.17 min, Identified with: Mascot (v1.27); IonScore:36, Exp Value:1.8E-002, Ions matched by search engine: 23/394  
Fragment match tolerance used for search: 0.8 Da
